# Supplementary material for: A pilot study comparing tools for tracking implementation strategies and treatment adaptations
Source: PubMed Central journal article supplement — Implement Res Pract. 2021 May 31;2:26334895211016028. doi: 10.1177/26334895211016028 (PMC9978654; doi:10.1177/26334895211016028), 2021-05-31
Supplement: sj-pdf-1-irp-10.1177_26334895211016028.pdf [file sj-pdf-1-irp-10.1177_26334895211016028.pdf]

## TABI Code List - DRAFT

7/25/2018

### **1- Implementation Strategies – Use evaluative and iterative strategies**

- 1a. Assess for readiness and identify barriers and facilitators
- 1b. Audit and provide feedback
- 1c. Purposefully reexamine the implementation
- 1d. Develop instruments to monitor and evaluate core components of the innovation/ new practice.
- 1e. Develop and organize quality monitoring systems
- 1f. Develop a detailed implementation plan or blueprint.
- 1g. Conduct local need assessment
- 1h. Stage implementation scale up
- 1i. Obtain and use patients/consumers and family feedback
- 1j. Conduct cyclical small tests of change
- 1k. Monitor the progress of the implementation effort
- 1l. None of the above

### **2-Implementation Strategies – Provider interactive assistance**

- 2a. Facilitation
- 2b. Provide local technical assistance
- 2c. Provide clinical supervision
- 2d. Centralize technical assistance
- 2e. None of the above

### **3-Implementation Strategies – Adapt and tailor to context**

- 3a. Tailor strategies
- 3b. Promote adaptability
- 3c. Use data experts
- 3d. Use data warehousing techniques
- 3e. Test-Drive and Select Practices. (pent\_68)
- 3f. None of the above

### **4-Implementation Strategies – Develop stakeholder interrelationships**

- 4a. Identify and prepare champions
- 4b. Organize school personnel implementation team meetings
- 4c. Recruit, designate, and train for leadership
- 4d. Inform local opinion leaders
- 4e. Build partnerships (i.e., coalitions) to support implementation.
- 4f. Obtain formal commitments
- 4g. Identify early adopters
- 4h. Conduct local consensus discussions
- 4i. Capture and share local knowledge
- 4j. Use advisory boards and workgroups

4k. Use an implementation advisor

- 4l. Model and simulate change
- 4m. Visit other sites
- 4n. Involve governing organizations
- 4o. Develop an implementation glossary
- 4p. Develop academic partnerships
- 4q. Promote network weaving
- 4r. Create new practice teams
- 4s. Peer-Assisted Learning
- 4t. None of the above

### **5-Implementation Strategies – Train and educate stakeholders**

- 5a. Conduct ongoing training
- 5b. Provide ongoing consultation/coaching
- 5c. Develop educational materials
- 5d. Make training dynamic
- 5e. Distribute educational materials
- 5f. Use train-the-trainer strategies
- 5g. Conduct educational meetings with specific stakeholders
- 5h. Conduct educational outreach visits
- 5i. Create a professional learning collaborative
- 5j. Shadow other experts
- 5k. Work with educational institutions
- 5l. Improve implementers' buy-in
- 5m. Pre-correction prior to implementation
- 5n. None of the above

### **6- Implementation Strategies – Support school personnel**

- 6a. Facilitate relay of intervention and student data to school personnel.
- 6b. Remind school personnel.
- 6c. Develop resource sharing agreements
- 6d. *Revise professional roles*
- 6e. Targeting/improving implementer wellbeing
- 6f. None of the above

### **7- Implementation Strategies – Engage consumers**

- 7a. Involve students, family members, and other staff.
- 7b. Intervene/ communicate with students, families, and other staff to enhance uptake and fidelity
- 7c. Prepare families and students to be active participants
- 7d. Increase demand and expectations for implementation
- 7e. Use mass media
- 7f. None of the above

## **8- Implementation Strategies – Utilize financial strategies**

- 8a. Fund and contract for the new practices.
- 8b. Access new funding
- 8c. *Place innovation on fee for service lists/formularies*
- 8d. Alter student or school personnel obligations to enhance participation in or delivery of new practice, respectively.
- 8e. *Make billing easier*
- 8f. *Alter patient/consumer fees*
- 8g. *Use other payment schemes*
- 8h. Develop disincentives
- 8i. *Use capitated payments*
- 8j. Provide system-level incentives
- 8k. None of the above

## **9- Implementation Strategies – Change infrastructure**

- 9a. Mandate for change
- 9b. Change record systems
- 9c. Change/alter environment
- 9d. Create or change credentialing and/or professional development standards
- 9e. Change school or community sites
- 9f. Change accreditation or membership requirements
- 9g. Start a dissemination/implementation organization
- 9h. Change liability laws
- 9i. Change ethical and professional standards of conduct
- 9j. Develop local policy that supports implementation
- 9k. Make implementation easier by removing burdensome documentation tasks
- 9l. Pruning competing initiatives. (pent\_60)
- 9m. None of the above

## **10- Stage of Implementation Completed**

- 10a. Planning
- 10b. Budgeting
- 10c. Delivering services
- 10d. Sustained

## **11-Adaptation – By whom are modifications made?**

- 11a. Individual practitioner/ facilitator
- 11b. Team
- 11c. Non-program staff
- 11d. Administration
- 11e. Program developer/ purveyor
- 11f. Researcher
- 11g. Coalition of stakeholders
- 11h. Unknown/ unspecified

## **12 – Adaptation – When did modification occur**

- 12a. Pre-implementation/planning/pilot
- 12b. Implementation

- 12c. Scale up
- 12d. Maintenance/Sustainment

## **13-Adaptation – Were adaptations planned?**

- 13a. Planned/Proactive (proactive adaptation)
- 13b. Planned/Reactive (reactive adaptation)
- 13c. Unplanned/Reactive (modification)
- 13d. Considered, unclear if implemented

## **14-Adaptation – Who participated in the decision to modify?**

- 14a. Political leaders
- 14b. Program Leader
- 14c. Funder
- 14d. Administrator
- 14e. Program manager
- 14f. Intervention developer/ purveyor
- 14g. Researcher
- 14h. Treatment/Intervention team
- 14i. Individual Practitioners (those who deliver it)
- 14j. Community members
- 14k. Recipients

## **15-Adaptation – What is modified?**

- 15a. Content
- 15b. Context
- 15c. Training and Evaluation

## **16-Adaptation - At what level of delivery (for whom/what are modifications made?)**

- 16a. Individual patient level
- 16b. Group level
- 16c. Individual practitioner level
- 16d. Clinic/ unit level
- 16e. Hospital level
- 16f. Network level
- 16g. System level

## **17-Adaptation - Context modifications are made to which of the following?**

- 17a. Format
- 17b. Setting
- 17c. Personnel
- 17d. Population

## **18-Adaptation - What is the nature of the content modifications?**

- 18a. Tailoring/ tweaking/ refining
- 18b. Adding elements
- 18c. Removing/ skipping elements
- 18d. Shortening/ condensing (pacing/ timing)
- 18e. Lengthening/ extending (pacing/ timing)
- 18f. Substituting

18g. Reordering of intervention modules or segments

18h. Integrating the intervention into another framework (e.g., selecting elements)

18i. Integrating another treatment into EBP (not using the whole protocol and integrating other techniques into a general EBP approach)

18k. Repeating elements of modules

18l. Loosening structure

18m. Departing from the intervention ("drift")

### **19-Adaptation – Impact on fidelity/core elements**

19a. Fidelity Consistent/Core elements preserved

19b. Fidelity Inconsistent/Core elements changed

19c. Unknown

### **20 – Activity information**

20a. Activity

20b. Data Request

20c. Discreet

20d. Planned

20e. Enacted

20f. Not followed through

20g. Action

### **21 – Dose**

21a. Dose – Ongoing

21b. Dose - Discreet

21c. If ongoing, how often

21d. Dose (additional details)

21e. Temporality

### **22 – Rational Information**

22a. Justification

22b. Was the activity explicitly chosen to address a barrier identified during the needs assessment?

22c. Action target

### **23 – Outcomes**

23a. Outcome

23b. Unit of Analysis

### **24. CFIR – Intervention Characteristics**

24a. Intervention Source

24b. Evidence Strength & Quality

24c. Relative Advantage

24d. Adaptability

24e. Trialability

24f. Complexity

24g. Design Quality & Packaging

24h. Cost

### **25. CFIR – Outer Setting**

25a. Patient Needs & Resources

25b. Cosmopolitanism

25c. Peer Pressure

25d. External Policy & Incentive

### **26. CFIR – Inner Setting**

26a. Structural Characteristics

26b. Networks & Communications

26c. Culture

26d. Implementation Climate

26d.1 Tension for Change

26d.2 Compatibility

26d.3 Relative Priority

26d.4 Organizational Incentives & Rewards

26d.5 Goals & Feedback

26d.6 Learning Climate

26e. Readiness for Implementation

26e.1 Leadership Engagement

26e.2 Available Resources

26e.3 Access to Knowledge & Information

### **27. CFIR – Characteristics of Individuals**

27a. Knowledge & Beliefs about the Intervention

27b. Self-efficacy

27c. Individual Stage of Change

27d. Individual Identification with Organization

27e. Other Personal Attributes

### **28. CFIR – Process**

28a. Planning

28b. Engaging

28b.1 Opinion Leaders

28b.2 Formally Appointed Internal Implementation Leaders

28.b.3 Champions

28.b.4 External Change Agents

28.c Executing

28.d Reflecting & Evaluating

## TABI Survey coding

Goal: Apply the same coding domains across all 3 survey types in order to a) determine if one type of survey elicits more actionable data than others, and b) allow for complete characterization of activities related to the Blues Program.

We are not interested in activities related to Action for Children. Any responses related to AfC and not NYF can be ignored. Do double check as some responses may include information about both.

Initial step: Determine if the survey response is reporting one of three domains a) an **implementation strategy**, b) a **treatment adaptation**, or c) a **barrier/facilitator**. Note: Depending on the survey type, the free text response may report on multiple types of activities. You will apply certain sets of codes depending upon the response type.

Coding is guided by the following published frameworks/compilations:

1. Proctor et al. (2013) Implementation strategies: recommendations for specifying and reporting
2. Powell et al. (2015) A refined compilation of implementation strategies: results from the Expert Recommendations for Implementing Change (ERIC) project
3. Damschroder et al. (2009) Fostering implementation of health services research findings into practice: a consolidated framework for advancing implementation science (CFIR)
4. Wiltsey Stirman et al. (2013) Development of a framework and coding system for modifications and adaptations of evidence-based interventions

### Implementation Strategy reporting requirements:

1. Name it
  - a. Did the respondent name a specific strategy used – look for action verbs (e.g. met, planned)  
Dichotomous yes/no check box (check if yes)  
Free text: Enter the strategy label from the Powell compilation that best matched the strategy referred to in the survey response. Enter each discrete strategy on a new line; information about each unique strategy should be entered in separate lines in subsequent questions  
If strategy not named, put unknown in strategy definition free text box
2. Define it
  - a. Did the respondent provide a conceptual definition of the strategy used? This is different than the operationalization of the strategy  
Dichotomous yes/no check box (check if yes)  
Free text: Copy and paste the strategy definition provided in the survey response.  
E.g. I assessed that there was a need for a "program champion." The program champion's role is to help supervisors support their staff to recruit for groups and address any barriers that present themselves during the implementation process
3. Actor specified
  - a. Did the respondent indicate who enacted the strategy? Note: this should not receive a yes if the response only indicates who was involved in carrying out the strategy, but does not specify who initiated or led the enactment of the strategy  
Dichotomous yes/no check box (check if yes)  
Free text: Assign a standardized label using codes 14a. – 14k.
4. Action specified
  - a. Did the respondent use active verb statements to specify the actions, processes, or steps taken  
Dichotomous yes/no check box (check if yes)  
Free text: Copy and paste the action described

5. Action target
  - a. Did the respondent indicate the intended target of the strategy (e.g. individual provider, intervention characteristic, setting)  
Dichotomous yes/no check box (check if yes)  
Free text: Assign a standardized label whenever possible. Use codes 14a. – 14k. for an individual or group target, use parent CFIR codes 24-28 if the target is intervention characteristic, process, or setting  
Decide based on description, purpose, and outcome. If not clear, indicate unknown and track in excel for Cara consensus
6. Temporality
  - a. Did the respondent indicate when the strategy is used? Look for specific dates, or in relation to a key event (e.g. one week before training)  
Dichotomous yes/no check box (check if yes)  
Free text: capture time (e.g. 1 hour, distinguish if prior to group start or while running groups)
7. Dose
  - a. Did the respondent indicate the dose of the strategy? This is usually expressed in time and discrete or ongoing (e.g. a one-time training that spanned two half-days; met hourly once a week for the duration of the Blues Program)  
Dichotomous discrete/ongoing check box  
Free text: Copy & paste the dose information from the survey response
8. Implementation outcome affected
  - a. Did the respondent identify the implementation outcome likely to be affected by the strategy? (e.g. participant recruitment aimed to increase **acceptability** of the Blues Program among students & families)  
Dichotomous yes/no check box (check if yes)  
Free text: Assign a standardized label based on the Proctor taxonomy of implementation outcomes. If the outcome does not match one of these outcomes, copy and paste from the survey response
9. Justification
  - a. Did the respondent provide empirical, theoretical, or pragmatic justification for the choice of implementation strategies (e.g. strategy may have been used in the Blues efficacy trial, provider successfully used the same or similar strategy to implement another EBP)  
Dichotomous yes/no check box (check if yes)  
Free text: Copy & paste the justification provided in the survey response
10. Stage of Implementation Completed
  - a. Select from one of four standardized responses to characterize at what stage the strategy is: Planning, Budgeting, Delivering services, Sustained

### Barriers/Facilitators

1. For each barrier/facilitator reported in the survey response, provide the standardized label from the CFIR compilation to the response (codes 24-28); if more than one barrier/facilitator is reported, enter each unique CFIR label in a new line. You do not need to provide the CFIR category label If the response describes a facilitator, put (facilitator) after the CFIR label in order to distinguish from barriers.
2. Code temporality

### Treatment Adaptation

1. By whom are modifications made?
  - a. Provide a standardized code 11a. – 11h. to characterize who is responsible for enacting the treatment adaptation. Note: this is different from who directed the treatment adaptation be made (e.g. an individual practitioner may be the one who actually modifies the treatment, but their supervisor is the person who directed the modification be made. You would apply the code 11a. individual practitioner/facilitator
2. When did modification occur?
  - a. Provide a standardized code 12a. – 12d. to characterize at what phase the modification is made. For example, an activity that indicates that a modification was discussed and the decision was made to modify in advance of a Blues Program session, this response would receive code 12a. If a modification was made during delivery of the Blues Program without prior planning, this response would receive code 12b.
3. Were adaptations planned?
  - a. Provide a standardized code 13a. – 13c. to characterize if a modification was planned or not. For example, a modification that describes plans to offer the Blues Program to younger students due to the age range of students in the school would receive code 13a. because it anticipates a need. A response that describes a plan to modify the treatment in order to react to something that happened in a previous session would receive code 13b.
4. Who participated in the decision to modify?
  - a. Provide a standardized code 14a. – 14h. to characterize who decided to make the modification. This may be multiple people such as the treatment developer (14f) and the Implementation support personnel at New York Foundling (14b). This may different from the person who enacts the adaptation; for example, an individual provider may enact the adaptation even if they did not participate in the decision to make the adaptation.
5. What is modified?
  - a. Provide a standardized code 15a. – 15c. to characterize who what aspect of the treatment or its periphery are modified. For example, 15a. content would be applied to changes made to the treatment itself, such as changing the number of sessions, or tweaking content to make it more relatable to students. Context modifications (15b.) could include changes to the population to whom treatment is offered (e.g. younger students) or the setting (e.g. offered at a satellite clinic rather than in the school).
6. At what level of delivery (for whom/what are modifications made?)
  - a. Provide a standardized code 16a. – 16g. to describe for whom or what the adaptations are made. For example, changes to a Blues Program session would be at the group level (16b.) because it is a group intervention. If exceptions were made for one student to allow them to complete homework assignments in a different manner, this would be at the individual patient level (16a.) Because only one group was run at a time in each school, we will likely only apply to the group level if it is reported by an individual practitioner. NYF or the treatment developer may have decided on treatment adaptations during training that would be applied to all groups, we could apply the code 16f. Network level.
7. Context modifications
  - a. Provide a standardized code 17a. – 17d. to characterize the changes made to the context in which treatment adaptations are made
8. Content modifications
  - a. Provide a standardized code 18a. – 18m. to characterize the changes made to the content of the Blues Program. Note that code 18m. for drift is only when the intervention is stopped for part of a session or if the treatment was discontinued altogether; this definition comes from the Wiltsey Stirman (2013) framework.
9. Impact on fidelity/core elements

- a. Provide a standardized code 19a. – 19c. to characterize the impact on fidelity the changes had. This could at times be difficult without turning to the Blues Program Efficacy studies. Minor changes, such as lengthening or shortening sessions, changing the number of sessions offered would be fidelity consistent. Changes that are indicated to be outside what was tested in the efficacy trials would likely be fidelity inconsistent.
