# Supplementary material for: A pilot study comparing tools for tracking implementation strategies and treatment adaptations
Source: PubMed Central journal article supplement — Implement Res Pract. 2021 May 31;2:26334895211016028. doi: 10.1177/26334895211016028 (PMC9978654; doi:10.1177/26334895211016028), 2021-05-31
Supplement: sj-pdf-2-irp-10.1177_26334895211016028.pdf [file sj-pdf-2-irp-10.1177_26334895211016028.pdf]

### Brainstorming Log

In this survey, we are asking about everything you did in the past week that was related to the Blues Program. Your answers will help us understand how people like you implement or adapt an evidence-based treatment in their jobs. Please think about all of your Blues Program-related activities for the week as you answer each question. At the end of the survey, we will ask you to rate the survey itself as a method for tracking the implementation and adaptation of the Blues Program.

**Q0.** What is your role? [select from list]

- Facilitator/therapist [if selected, display Section III after Section II]
- New York Foundling staff
- Trainer/Treatment developer
- Other (Please specify) [text box]

**Q1.** What week or range of dates are you reporting?

[text box]

#### ***Part I: Treatment Adaptation***

**Q2.** Please describe any ways that you modified (or discussed modifying) the **content** of the Blues Program. This could include adding, removing, or substituting elements, or shortening or lengthening the program.

[text box]

**Q3.** Please describe any ways that you modified (or discussed modifying) the **context** of the Blues Program. This could include changing the personnel who deliver the program or the population of people who receive the program.

[text box]

#### ***Part II: Tailored Implementation***

**Q4.** Please describe any barriers or concerns about using the Blues Program.

A barrier is any factor that makes it difficult for facilitators to implement the program as intended. For example, there is no suitable group room at the school, or the teens are not interested in signing up, or the group facilitator has never before been exposed to cognitive behavioral therapy.

[text box]

**Q5.** Thinking about the barriers you described in the previous question, please describe any strategies that might help overcome them. These could be strategies you've used or that were brought up by any of the team members. If possible, please specify which strategies could be used for which barriers. Strategies could include using the gym instead of a group room, or making catchy posters to interest teens, or providing/obtaining clinical supervision in the Blues Program, for example.

[text box]

**Q5.** Are you ready to submit the Brainstorming Log?

No, save to complete later [save and exit]

Yes [display Q x-x]

## Tracking Adaptation of Blues Program Implementation (TABI)

### SECTION 2

Thank you for completing the Brainstorming Log. It is one of three tracking methods that we are testing. Please tell us about your experience using the Brainstorming Log to track how the Blues Program was implemented or adapted in your job.

#### Acceptability of Tracking Method

|                                             | Completely disagree | Disagree | Neither agree nor disagree | Agree | Completely agree |
|---------------------------------------------|---------------------|----------|----------------------------|-------|------------------|
| Q. This tracking method meets my approval.  | ①                   | ②        | ③                          | ④     | ⑤                |
| Q. This tracking method is appealing to me. | ①                   | ②        | ③                          | ④     | ⑤                |
| Q. I like this tracking method              | ①                   | ②        | ③                          | ④     | ⑤                |
| Q. I welcome this tracking method.          | ①                   | ②        | ③                          | ④     | ⑤                |

#### Feasibility of Tracking Method

|                                              | Completely disagree | Disagree | Neither agree nor disagree | Agree | Completely agree |
|----------------------------------------------|---------------------|----------|----------------------------|-------|------------------|
| Q. This tracking method seems implementable. | ①                   | ②        | ③                          | ④     | ⑤                |
| Q. This tracking method seems possible.      | ①                   | ②        | ③                          | ④     | ⑤                |
| Q. This tracking method seems doable.        | ①                   | ②        | ③                          | ④     | ⑤                |
| Q. This tracking method seems easy to use.   | ①                   | ②        | ③                          | ④     | ⑤                |

#### Appropriateness of Tracking Method

|                                         | Completely disagree | Disagree | Neither agree nor disagree | Agree | Completely agree |
|-----------------------------------------|---------------------|----------|----------------------------|-------|------------------|
| Q. This method seems fitting.           | ①                   | ②        | ③                          | ④     | ⑤                |
| Q. This method seems suitable.          | ①                   | ②        | ③                          | ④     | ⑤                |
| Q. This method seems applicable.        | ①                   | ②        | ③                          | ④     | ⑤                |
| Q. This method seems like a good match. | ①                   | ②        | ③                          | ④     | ⑤                |

Q. Please tell us why you rated this tracking method the way you did. What did you like/not like about it?

[text box]

### SECTION III

Please tell us about how you adapt the Blues Program in your job.

|                                                                                     | Not at all |   |   |   | A very great extent |
|-------------------------------------------------------------------------------------|------------|---|---|---|---------------------|
| Q. I modify how I present or discuss components of the Blues Program.               | ①          | ② | ③ | ④ | ⑤                   |
| Q. I implement supplemental content or strategies when I deliver the Blues Program. | ①          | ② | ③ | ④ | ⑤                   |

Tracking Adaptation of Blues Program Implementation (TABI)

|                                                       |   |   |   |   |   |
|-------------------------------------------------------|---|---|---|---|---|
| Q. I lengthen/extend the pacing of the Blues Program. | ① | ② | ③ | ④ | ⑤ |
| Q. I remove/skip components of the Blues Program.     | ① | ② | ③ | ④ | ⑤ |
| Q. I adjust the order of the Blues Program.           | ① | ② | ③ | ④ | ⑤ |
| Q. I shorten/condense pacing of the Blues Program.    | ① | ② | ③ | ④ | ⑤ |
