# Supplementary material for: A pilot study comparing tools for tracking implementation strategies and treatment adaptations
Source: PubMed Central journal article supplement — Implement Res Pract. 2021 May 31;2:26334895211016028. doi: 10.1177/26334895211016028 (PMC9978654; doi:10.1177/26334895211016028), 2021-05-31
Supplement: sj-pdf-3-irp-10.1177_26334895211016028.pdf [file sj-pdf-3-irp-10.1177_26334895211016028.pdf]

## Activity Log

In this survey, we are asking about everything you did in the past week that was related to the Blues Program. Your answers will help us understand how people like you implement or adapt an evidence-based treatment in their jobs. You will be able to describe **up to six different activities** from the past week that were related to the Blues Program. Please think about **one activity at a time** as you answer the questions. You will be able to repeat the questions up to six times. At the end of the survey, we will ask you to rate the survey itself as a method for tracking the implementation and adaptation of the Blues Program.

### SECTION 1

**1.1.** What is your role? [select from list]

- Facilitator/therapist [if selected, display Section 3 after Section 2]
- New York Foundling staff
- Trainer/Treatment developer
- Other (Please specify) [text box]

**1.2. Event/Activity** –Please give a short description of one event or activity you did in the past week that was related to the Blues Program. Examples: [display examples based on role selected in Q0]

- For therapists/facilitators: For example, reordered the session modules, or changed the examples to be culturally relevant to clients.
- For New York Foundling staff: For example, assessed barriers to implementing the Blues Program, or captured and shared information about how the Blues Program implementation is going.
- For Trainer/Treatment developer: For example, reminded therapists to use the elements or concepts from the Blues Program, or changed the number of sessions offered or amount of time spent in sessions.

**\*\*If you are unsure whether an activity should be included, include it anyway and provide us with a good description so we can best classify your efforts.**

[text box]

**1.3. Date** of event/activity (You may give a range of dates if an activity was ongoing)

[text box]

**1.2. Time** spent on event/activity (Example: 3-5pm. Estimates are fine.)

[text box]

**1.3 Purpose** – Why was this event/activity chosen? For example, was it to address a specific barrier, and if so, what was the barrier?

[text box]

**1.4 Outcome** – What was the intended outcome of the activity? How would you know that it had the effect you intended?

**1.5 Attendees** – if you participated in the event/activity with others, please note the names and roles of your collaborators here.

[text box]

**1.6.** Do you have another event/activity to describe?

Tracking Adaptations of Blues Program Implementation (TABI) Pilot

- Yes [repeat Q1-6]
- No [continue to next section]

SECTION 2

Thank you for completing the Activity Log. It is one of three tracking methods that we are testing. Please tell us about your experience using the Activity Log to track how the Blues Program was implemented or adapted in your job.

Acceptability of Tracking Method

|                                              | Completely disagree | Disagree | Neither agree nor disagree | Agree | Completely agree |
|----------------------------------------------|---------------------|----------|----------------------------|-------|------------------|
| 2.1 This tracking method meets my approval.  | ①                   | ②        | ③                          | ④     | ⑤                |
| 2.2 This tracking method is appealing to me. | ①                   | ②        | ③                          | ④     | ⑤                |
| 2.3 I like this tracking method              | ①                   | ②        | ③                          | ④     | ⑤                |
| 2.4 I welcome this tracking method.          | ①                   | ②        | ③                          | ④     | ⑤                |

Feasibility of Tracking Method

|                                                | Completely disagree | Disagree | Neither agree nor disagree | Agree | Completely agree |
|------------------------------------------------|---------------------|----------|----------------------------|-------|------------------|
| 2.10 This tracking method seems implementable. | ①                   | ②        | ③                          | ④     | ⑤                |
| 2.11 This tracking method seems possible.      | ①                   | ②        | ③                          | ④     | ⑤                |
| 2.12 This tracking method seems doable.        | ①                   | ②        | ③                          | ④     | ⑤                |
| 2.13 This tracking method seems easy to use.   | ①                   | ②        | ③                          | ④     | ⑤                |

Appropriateness of Tracking Method

|                                           | Completely disagree | Disagree | Neither agree nor disagree | Agree | Completely agree |
|-------------------------------------------|---------------------|----------|----------------------------|-------|------------------|
| 2.14 This method seems fitting.           | ①                   | ②        | ③                          | ④     | ⑤                |
| 2.15 This method seems suitable.          | ①                   | ②        | ③                          | ④     | ⑤                |
| 2.16 This method seems applicable.        | ①                   | ②        | ③                          | ④     | ⑤                |
| 2.17 This method seems like a good match. | ①                   | ②        | ③                          | ④     | ⑤                |

2.18 Please tell us why you rated this tracking method the way you did. What did you like/not like about it?  
[text box]

SECTION 3

Please tell us how you adapt the Blues Program in your job.

|                                                                                      | Not at all |   |   |   | A very great extent |
|--------------------------------------------------------------------------------------|------------|---|---|---|---------------------|
| 3.1 I modify how I present or discuss components of the Blues Program.               | ①          | ② | ③ | ④ | ⑤                   |
| 3.2 I implement supplemental content or strategies when I deliver the Blues Program. | ①          | ② | ③ | ④ | ⑤                   |
| 3.3 I lengthen/extend the pacing of the Blues Program.                               | ①          | ② | ③ | ④ | ⑤                   |
| 3.4 I remove/skip components of the Blues Program.                                   | ①          | ② | ③ | ④ | ⑤                   |
| 3.5 I adjust the order of the Blues Program.                                         | ①          | ② | ③ | ④ | ⑤                   |
| 3.6. I shorten/condense pacing of the Blues Program.                                 | ①          | ② | ③ | ④ | ⑤                   |
